# Supplementary material for: Over-Expression of Dehydroascorbate Reductase Improves Salt Tolerance, Environmental Adaptability and Productivity in Oryza sativa
Source: MDPI journal article supplement (doi:10.3390/antiox11061077), 2022-05-28
Supplement: s1 [file s1]

## Supporting Information

### High Expression of Dehydroascorbate Reductase Improves Salt Tolerance, Environmental Adaptability, and Productivity in *Oryza sativa*

Young-Saeng Kim <sup>1,\*</sup>, Seong-Im Park <sup>2,†</sup>, Jin-Ju Kim <sup>2</sup>, Sun-Young Shin <sup>3</sup>, Sang-Soo Kwak <sup>5</sup>, Choon-Hwan Lee <sup>6</sup>, Hyang-Mi Park <sup>7</sup>, Yul-Ho Kim <sup>8</sup>, Il-Sup Kim <sup>4,\*</sup> and Ho-Sung Yoon <sup>2,3,4,\*</sup>

<sup>1</sup> Research Institute of Ulleung-do & Dok-do, Kyungpook National University, Daegu 41566, Korea; kyslhh1228@hanmail.net

<sup>2</sup> School of Life Sciences, BK21 Plus KNU Creative BioResearch Group, Kyungpook National University, Daegu 41566, Korea; sheep91528@naver.com (S.-I.P.); deenamon@naver.com (J.-J.K.)

<sup>3</sup> Department of Biology, College of Natural Sciences, Kyungpook National University, Daegu 41566, Korea; snowmooa@hanmail.net

<sup>4</sup> Plant Systems Engineering Research Center, Korea Research Institute of Bioscience and Biotechnology, Daejeon 34141, Korea; sskwak@kribb.re.kr

<sup>5</sup> Department of Molecular Biology, Pusan National University, Busan 46241, Korea; chlee@pusan.ac.kr

<sup>6</sup> National Institute of Crop Science, Rural Development Administration, Jeonju 54875, Korea; parkhm2002@korea.kr

<sup>7</sup> Highland Agriculture Research Institute, National Institute of Crop Science, Rural Development Administration, Pyeongchang 25342, Korea; kimyuh77@korea.kr

<sup>8</sup> Advanced Bio-Resource Research Center, Kyungpook National University, Daegu 41566, Korea

\* Correspondence: 92kis@hanmail.net (I.-S.K.); hsy@knu.ac.kr (H.-S.Y.)

† These authors contributed equally to this work.

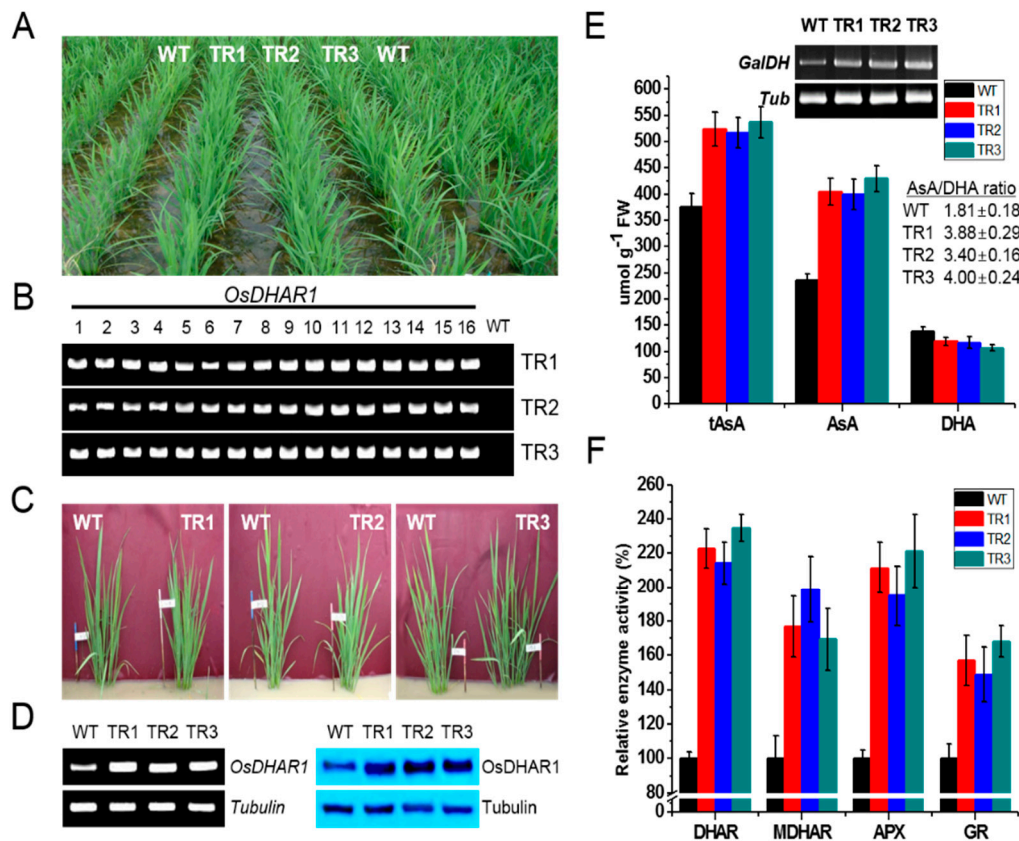

**Figure S1.** Environmental adaptability of *OsDHAR1*-expressing transgenic plants in a natural paddy field. **(a)** Phenotype analysis of TR and WT plants in the vegetative stage. **(b)** PCR confirmation of *OsDHAR1* expression in three separate TR plants (TR1-TR3). **(c)** Phenotype of TR and WT plants grown for 4 weeks in the paddy fields. **(d)** Confirmation of *OsDHAR1* expression using semi-quantitative RT-PCR and western blot analysis. Signal intensity in WT plants was due to endogenous *DHAR1* expression. *Tubulin* (*Tub*) and corresponding protein were used as loading controls. WT, wild-type rice; TR, transgenic rice. **(e)** Ascorbate pool and *GalDH* expression in TR and WT plants 4 weeks after transplantation. **(f)** Enzymatic activity of TR and WT plants grown for 4 weeks in the paddy field.

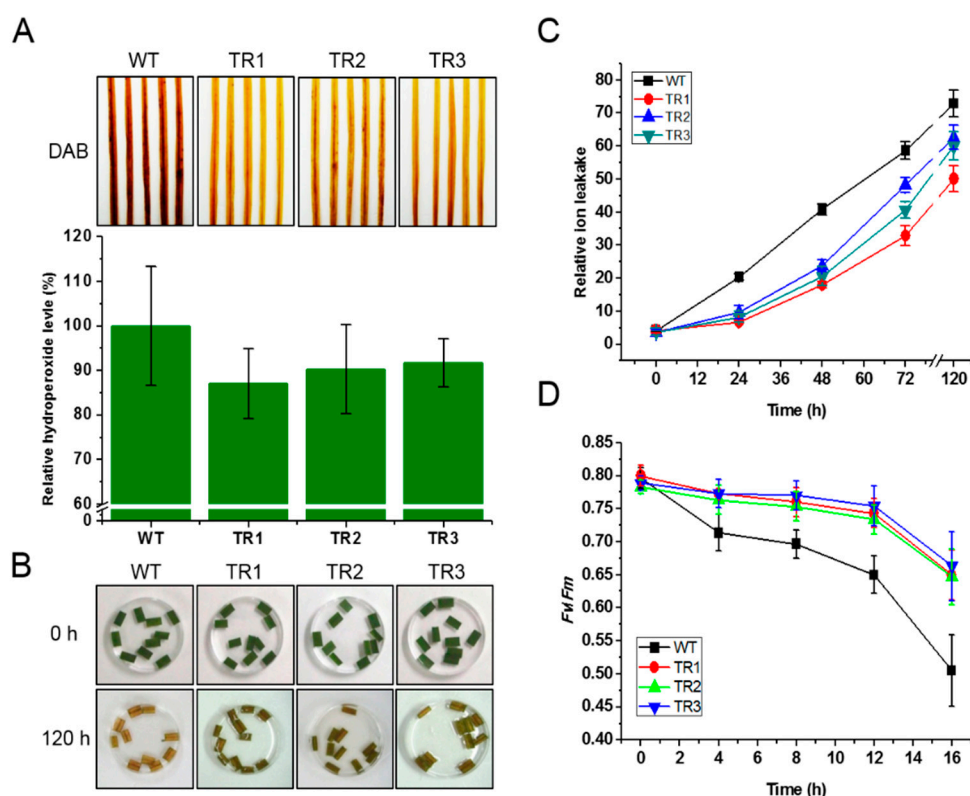

**Figure S2.** Redox state and photosynthetic capacity of *OsDHAR1*-expressing transgenic plants. **(a)** 3,3-Diaminobenzidine (DAB) staining phenotype and relative hydroperoxide level in leaves from TR and WT plants treated with 50  $\mu$ M methyl viologen (MV) for 12 h. **(b)** Phenotype analysis of cells damaged in leaf discs of TR and WT plants exposed with 10  $\mu$ M MV for 120 h. **(c)** Relative ion leakage in TR and WT plants treated with 10  $\mu$ M MV from 0 h to 120 h. **(d)** Changes in chlorophyll fluorescence ( $F_v/F_m$ ) in three independent TR and WT plants in response treatment with 10  $\mu$ M MV.

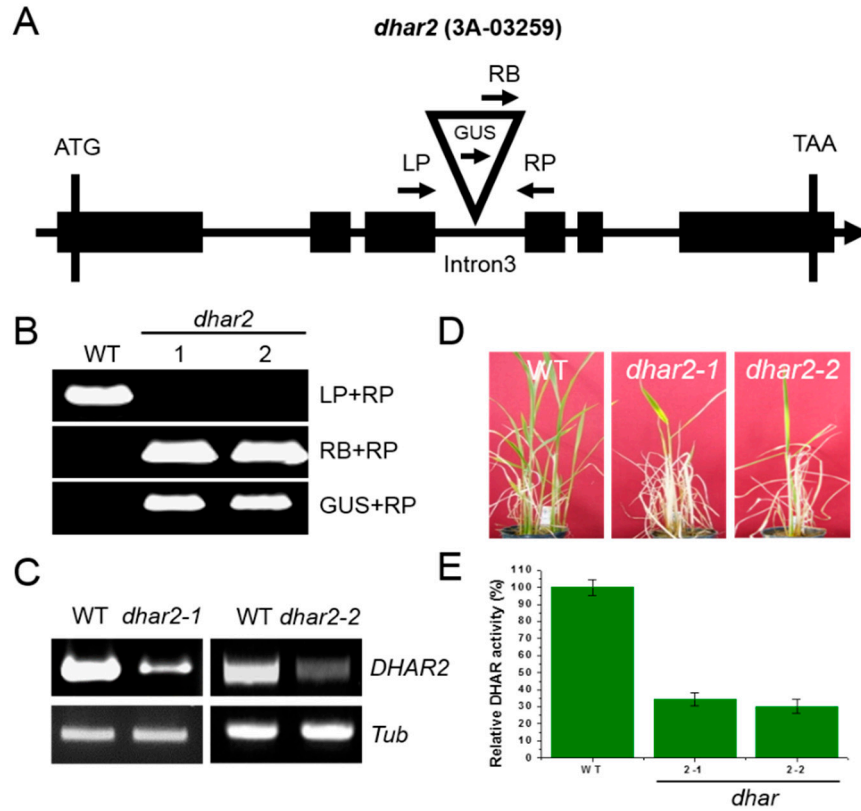

**Figure S3.** Characterization of *OsDHAR2* knockdown mutants. (a) Insertion positions of T-DNA spanning the mutation site in *dhar2* (3A-03259). (b) PCR-based confirmation of *dhar2* mutant lines. (c) Evaluation of *DHAR2* expression in *dhar2* plants using semi-quantitative RT-PCR. (d) Relative DHAR activity in *dhar2* and WT plants. (e) Phenotype of *dhar2* and WT plants treated with 100 mM NaCl for 25 days.

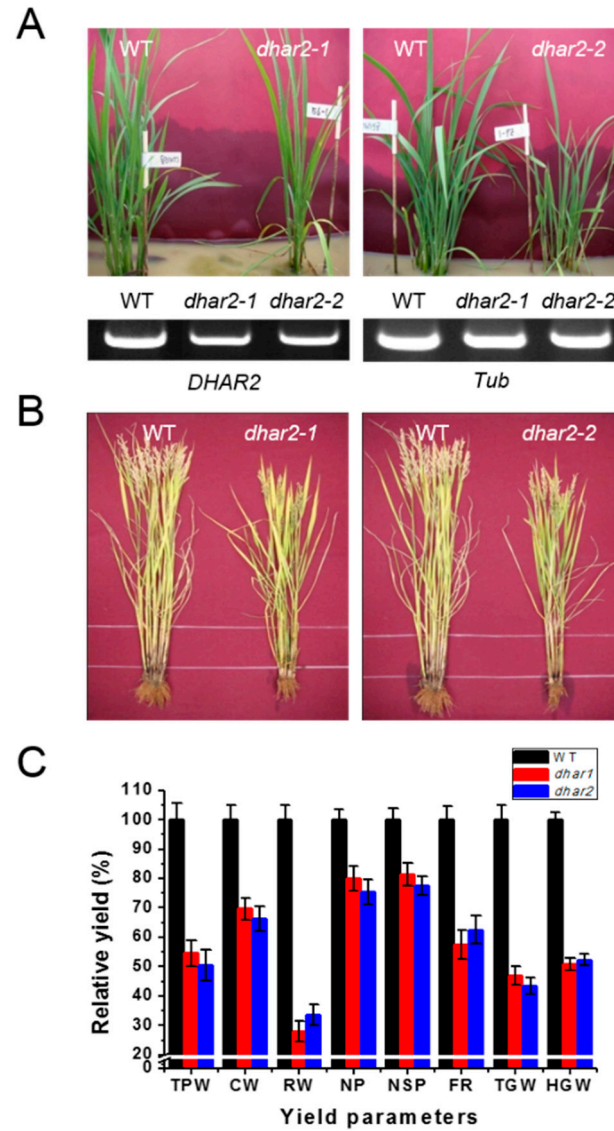

**Figure S4.** The poor the agronomic parameters of the *dhar2* plants grown in the paddy field. (a) Phenotype and *DHAR2* expression in *dhar2* and WT plants grown for 4 weeks in the paddy fields. (b) Phenotypes of *dhar2* and WT plants at the late reproductive stage. (c) Agronomic traits of *dhar2* and WT plants.

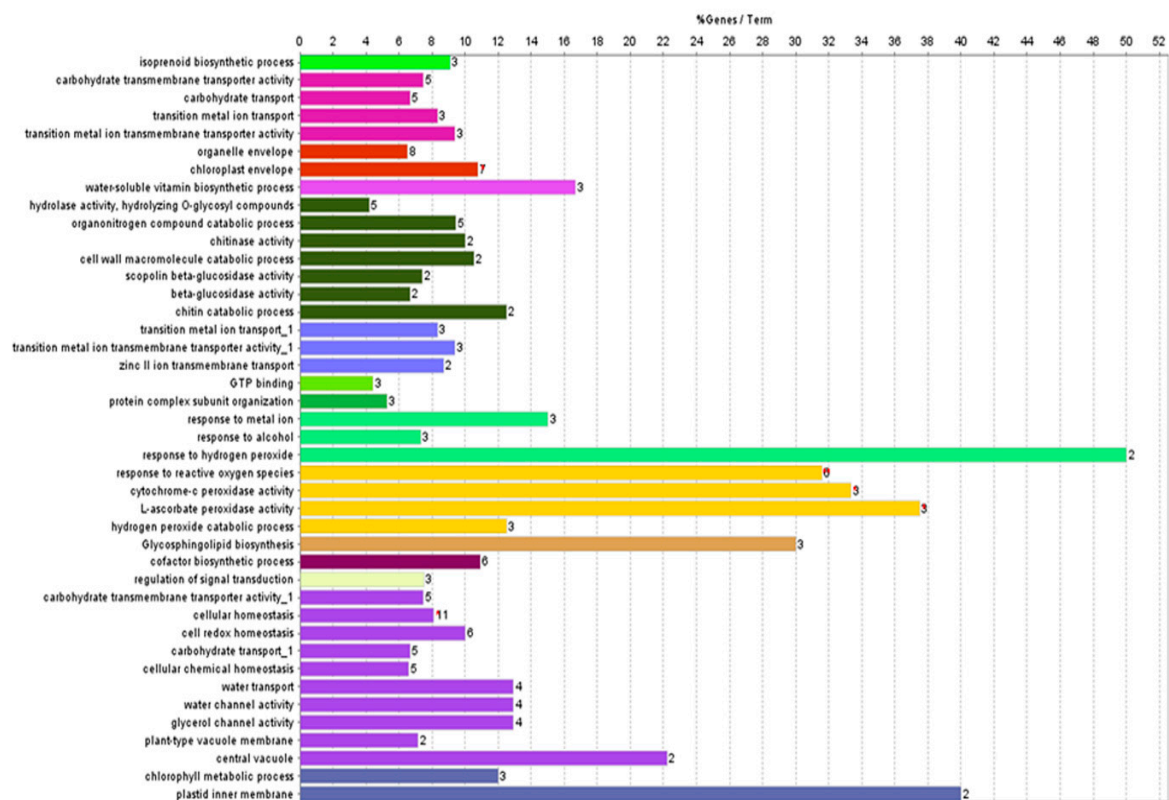

**Figure S5.** Gene ontology of the genes upregulated in transgenic rice (TR1) plants.

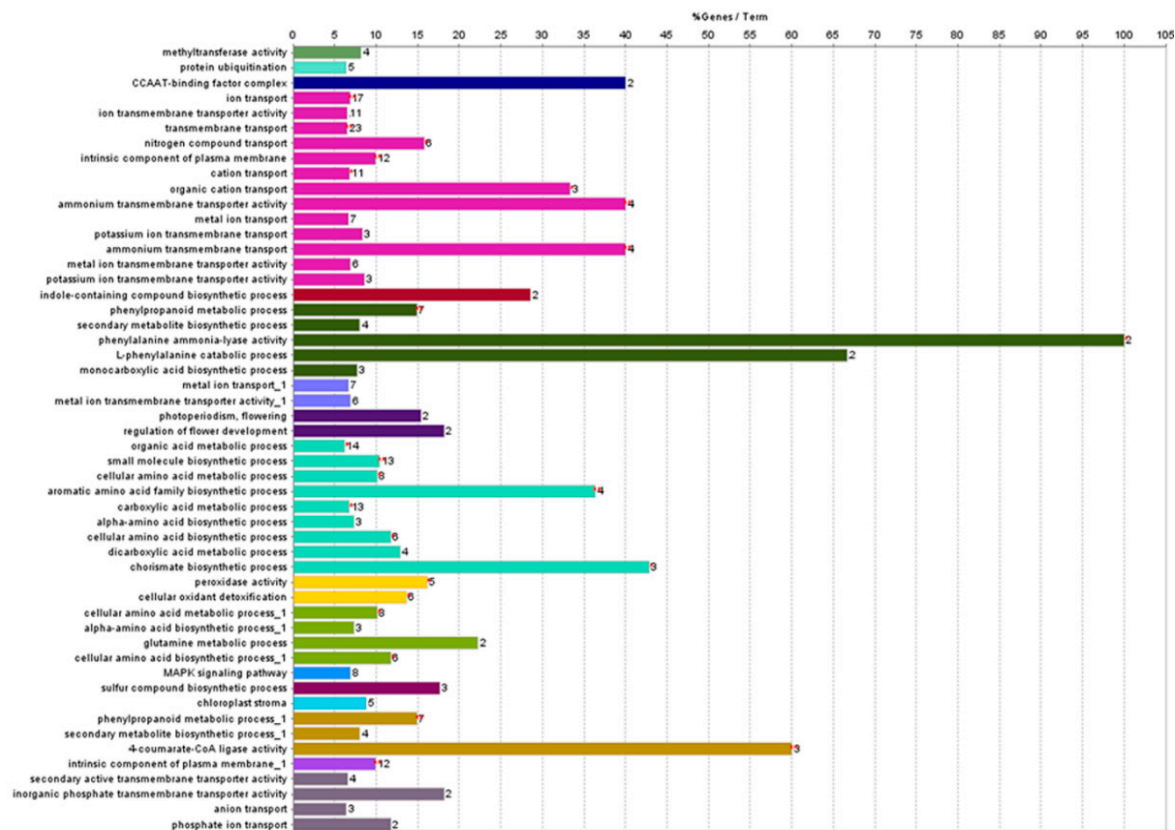

**Figure S6.** Gene ontology of the genes downregulated in transgenic rice (TR1) plants.





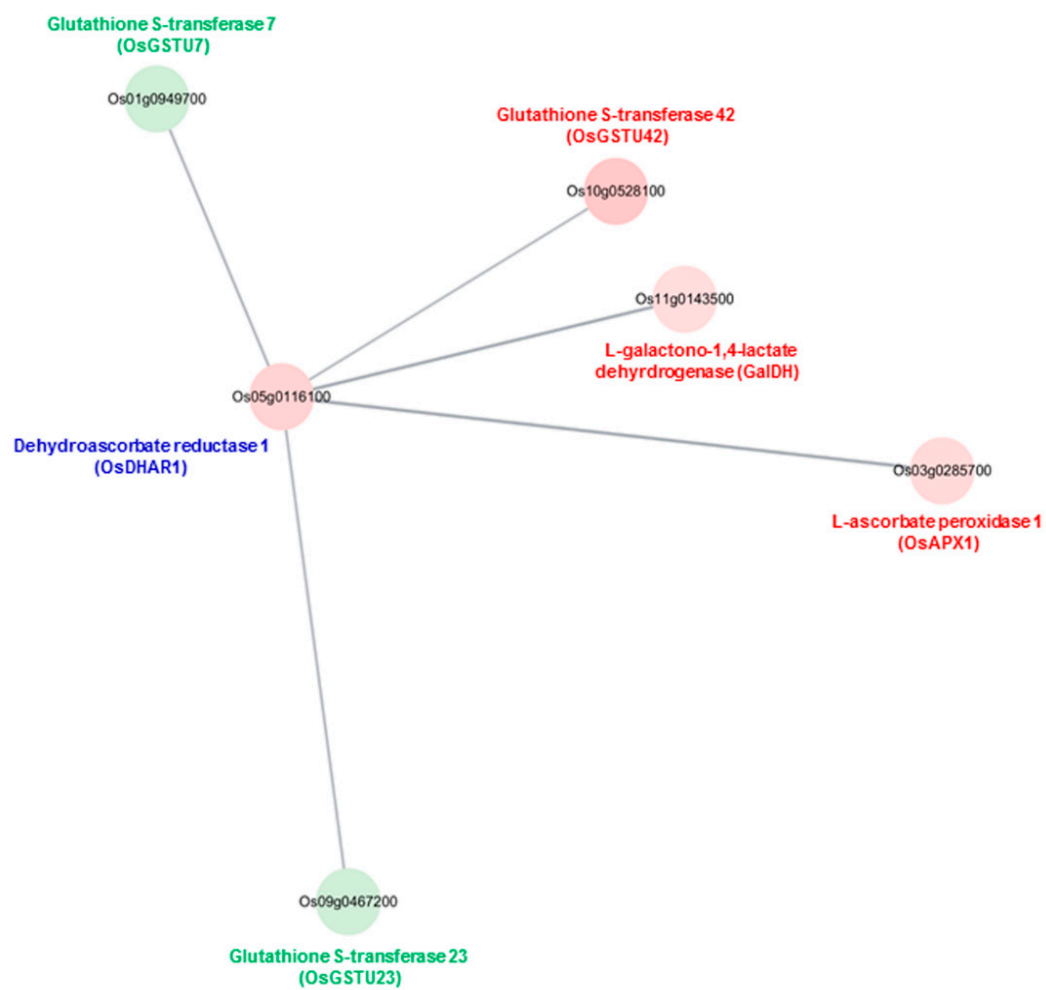

**Figure S8.** Genetic interaction map of *OsDHA1* and other genes in transgenic rice (TR1) plants. The up- and downregulated genes are marked in red and green, respectively.



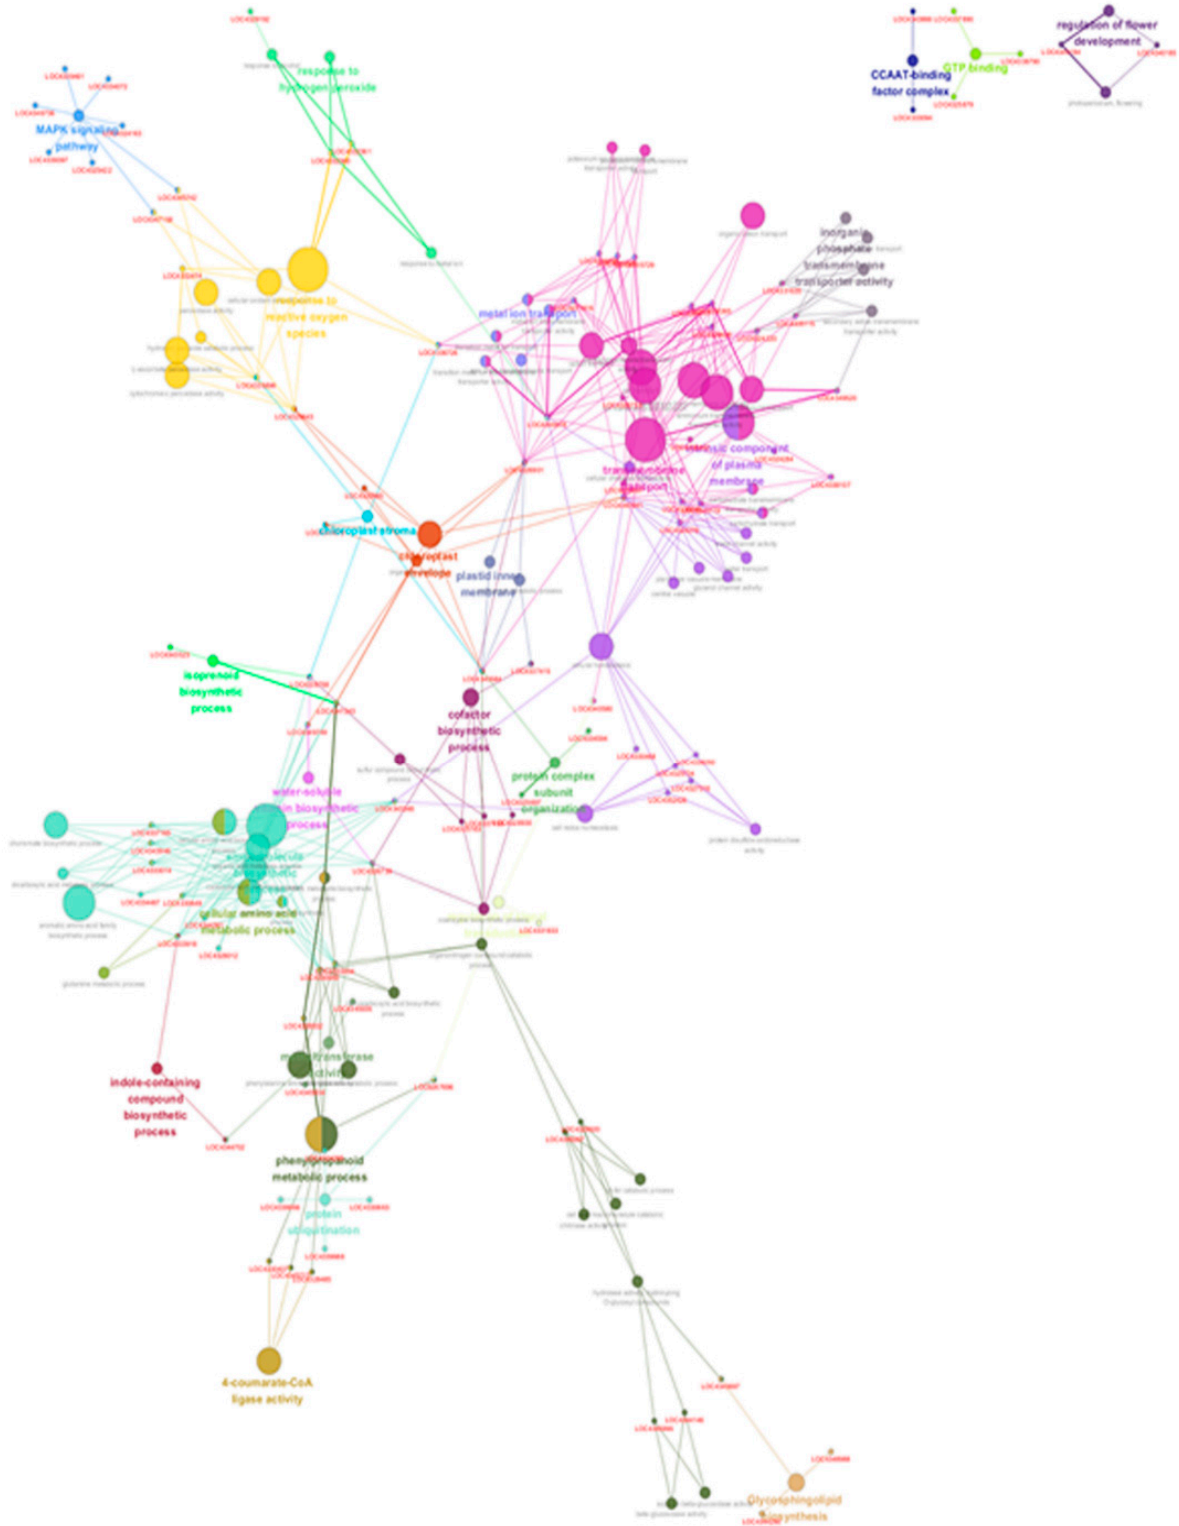

**Figure S9.** Genetic network of up- and downregulated genes in transgenic rice (TR1) plants.

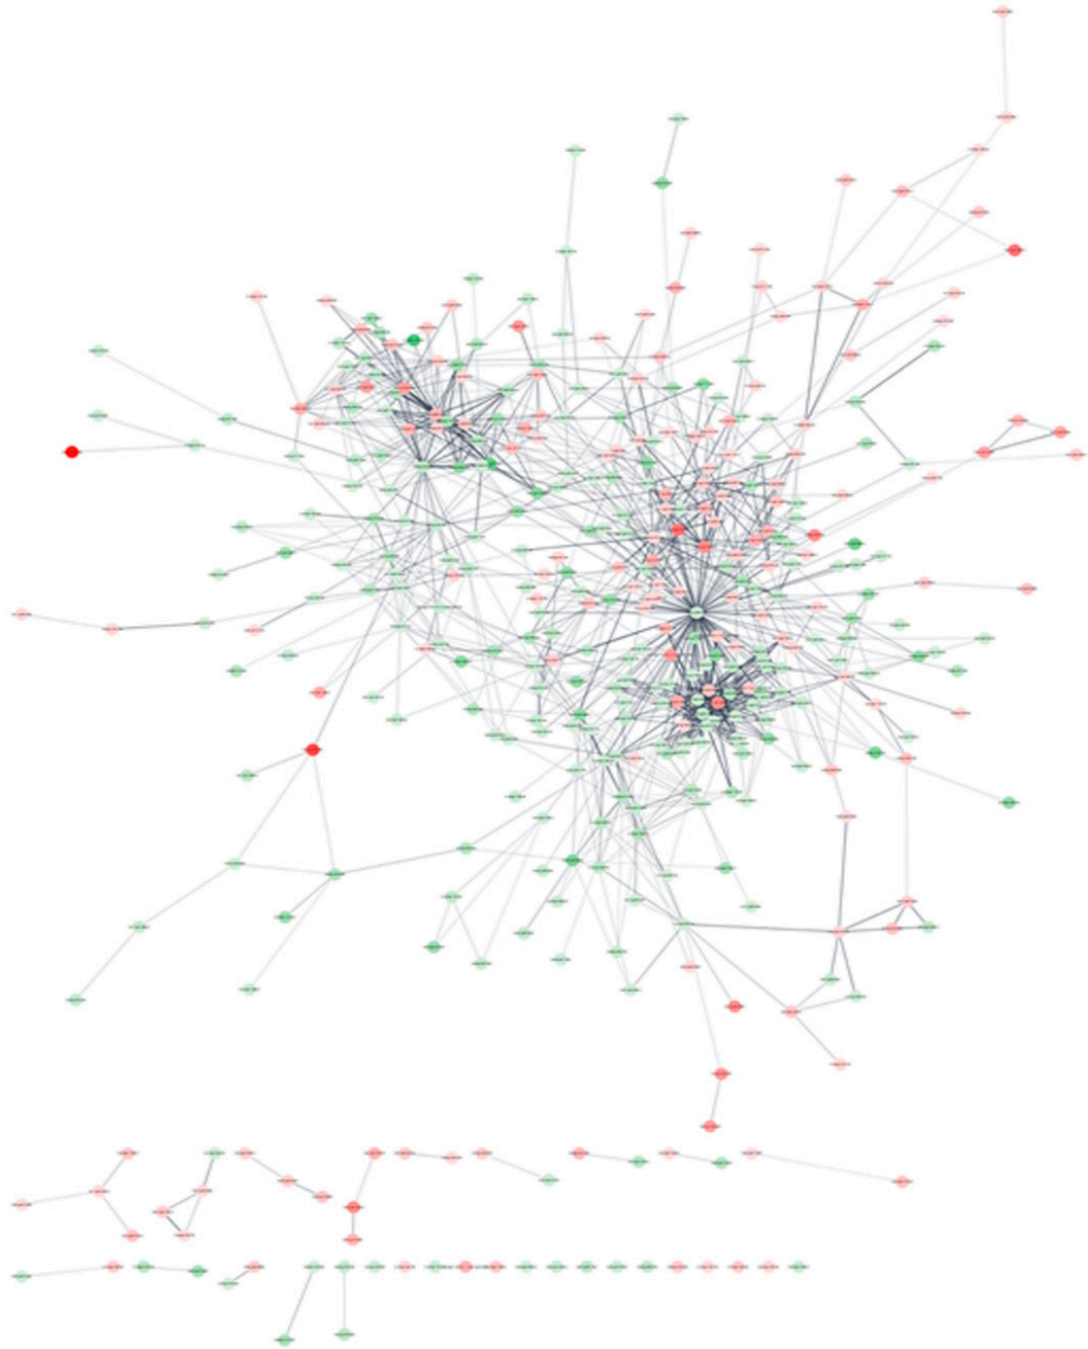

**Figure S10.** Gene to gene network of differentially expressed genes.

**Table S1.** Oligonucleotides used in the present study.

| Oligo name | Oligonucleotide sequences (5'-3')               |
|------------|-------------------------------------------------|
| OsDHAR-FC  | TCGCCG <u>CCATGGG</u> CGTGGAGGTGTGCG            |
| OsDHAR-RC  | CCAAGCAAG <u>GGTACCT</u> GCAGGCTGCATCTCCATTATTC |
| SWPA2-F1   | TGCCTTCATACGCTATTTATTTGCTTGG                    |
| OsDHAR-R1  | CCTTGCTCTTCAAGAACGTTGTGAAGC                     |
| OsDHAR-F2  | ATGGGCGTGGAGGTGTGCGTCAAGG                       |
| OsDHAR-R2  | CCTTGCTCTTCAAGAACGTTGTGAAGC                     |
| LP         | AAGCGCAATTTTACAGCTGAG                           |
| RP         | CCGTTAATAAATGGACCCTGC                           |
| RB         | TTTCGCGATCCAGACTGAATG                           |
| GUS        | ATGTGGAGTGAAGAGTATCAGTGTGC                      |
| ADA1       | GCGTAATACGACTCACTATAGCAATTAACC                  |
| ADA2       | GACTCACTATAGCAATTAAC                            |
| LB1        | GTGTGAGTAGTTCCTCCAGATAAGGGAATTAGG               |
| LB2        | CGCTCATGTGTTGAGCATA                             |
| RB1        | CCCGCACCGATCGCCCTTCCCA                          |
| RB2        | GCAGCTTGAGCTTGGATCAGA                           |
| GalDH-F    | TACAGGGAAGGGTTCGACTTCAGC                        |
| GalDH-R    | AGCACATAAGTGTAGATGCTCAATG                       |
| Tub-F      | TACCGTGCCCTTACTGTTCC                            |
| Tub-R      | CGGTGGAATGTCACAGACAC                            |

Underlined nucleotides indicate the sites recognized by the restriction enzymes. Primer sequences were designed based on the information hosted on RAP-DB (<http://rapdb.dna.affrc.go.jp/>).

**Table S2.** Copy number and location of the *OsDHAR1* transgene.

| TR  | Chromo | Matching | Chr_start | Chr_end  | Type       | Gene ID        | Description   |
|-----|--------|----------|-----------|----------|------------|----------------|---------------|
| No. | some   | (%)      |           |          |            |                |               |
| TR1 | Chr03  | 100      | 14536694  | 14536533 | Intergenic | Os03g0360000   | Similar to    |
|     |        |          |           |          |            | upstream 3.008 | arginine      |
|     |        |          |           |          |            | kb             | decarboxylase |
| TR2 | Chr08  | 100      | 27527684  | 27527785 | Intron     | Os08g0547500   | Similar to    |
|     |        |          |           |          |            |                | kinesin-like  |
|     |        |          |           |          |            |                | protein NACK1 |

|     |       |     |          |          |      |              |                                             |
|-----|-------|-----|----------|----------|------|--------------|---------------------------------------------|
| TR3 | Chr04 | 100 | 27722481 | 27722149 | Exon | Os04g0543700 | Similar to serine<br>protease<br>(fragment) |
|-----|-------|-----|----------|----------|------|--------------|---------------------------------------------|

**Table S3.** Genes upregulated in paddy field-grown transgenic rice (TR1) plants.

| Gene symbol  | Intensity | Gene information                                                                                                    |
|--------------|-----------|---------------------------------------------------------------------------------------------------------------------|
| Os03g0115800 | 223.33    | Conserved hypothetical protein                                                                                      |
| Os11g0206000 | 210.14    | Conserved hypothetical protein                                                                                      |
| Os03g0115800 | 149.52    | Conserved hypothetical protein                                                                                      |
| Os07g0153100 | 114.97    | Hypothetical protein                                                                                                |
| Os01g0382000 | 38.57     | Similar to pathogenesis-related protein PRB1-2 precursor                                                            |
| Os06g0229000 | 13.64     | Similar to FtsH protease (VAR2) (Zinc dependent protease)                                                           |
| Os12g0628600 | 9.19      | Similar to thaumatin-like pathogenesis-related protein 3 precursor                                                  |
| Os11g0113700 | 7.41      | Serine/threonine protein kinase, abiotic stresses                                                                   |
| Os06g0685300 | 6.84      | Similar to isoflavone reductase homolog IRL                                                                         |
| Os11g0530600 | 6.46      | Similar to chalcone synthase C2 (EC 2.3.1.74)                                                                       |
| Os12g0569500 | 5.98      | Thauatin, pathogenesis-related family protein                                                                       |
| Os04g0249600 | 5.85      | Similar to senescence-associated protein DIN1                                                                       |
| Os01g0314800 | 5.02      | Late embryogenesis abundant protein 3 family protein                                                                |
| Os05g0160300 | 4.95      | Bifunctional inhibitor/plant lipid transfer protein/seed storage domain containing protein                          |
| Os01g0136100 | 4.48      | 16.9 kDa class I heat shock protein 1                                                                               |
| Os04g0612400 | 4.33      | Similar to root-specific protein; RCc2 protein                                                                      |
| Os04g0612500 | 4.32      | Similar to 36.4 kDa proline-rich protein                                                                            |
| Os04g0612400 | 4.20      | Protease inhibitor/seed storage/LTP family protein precursor                                                        |
| Os01g0184100 | 4.07      | Similar to 17.5 kDa class II heat shock protein                                                                     |
| Os01g0368900 | 4.04      | Similar to glutaredoxin-C1; glutaredoxin 4                                                                          |
| Os01g0124000 | 3.92      | Similar to bowman birk trypsin inhibitor                                                                            |
| Os03g0431200 | 3.86      | Similar to N-acetyl-glutamate synthase                                                                              |
| Os10g0491000 | 3.83      | Plant basic secretory protein family protein                                                                        |
| Os10g0490800 | 3.67      | Similar to secretory protein                                                                                        |
| Os03g0663400 | 3.55      | Similar to thaumatin-like protein; OsLP                                                                             |
| Os12g0541700 | 3.52      | Similar to rapid alkalinization factor 2                                                                            |
| CB647177     | 3.13      | Photosystem II 10 kDa polypeptide, chloroplast precursor                                                            |
| Os10g0528100 | 3.06      | Similar to glutathione S-transferase GST 42; OsGSTU24                                                               |
| Os05g0413200 | 2.89      | Beta-tubulin; OsTUB6                                                                                                |
| Os03g0820500 | 2.84      | Actin depolymerizing factor 3; OsADF3                                                                               |
| Os02g0758000 | 2.77      | Similar to low molecular weight heat shock protein precursor (mitochondrial small heat shock protein 22); OsHsp24.1 |
| Os01g0279100 | 2.71      | Similar to basic leucine zipper transcription factor CAT103                                                         |
| Os06g0625400 | 2.68      | Similar to metalloendopeptidase                                                                                     |

|              |      |                                                                                            |
|--------------|------|--------------------------------------------------------------------------------------------|
| Os01g0186000 | 2.67 | Similar to WRKY transcription factor 10; OsWRKY10                                          |
| Os02g0258900 | 2.65 | Similar to molybdopterin biosynthesis CNX2 protein                                         |
| Os04g0688100 | 2.65 | Peroxidase; Prx59                                                                          |
| Os06g0650900 | 2.62 | Heat shock protein DnaJ family protein; OsDjC56                                            |
| Os05g0582000 | 2.58 | Plant basic secretory protein domain containing protein                                    |
| Os10g0548600 | 2.56 | Beta-expansin precursor; OsEXPB9                                                           |
| Os03g0218500 | 2.52 | Similar to 70kD heat shock protein                                                         |
| BQ907184     | 2.49 | Photosystem II 10 kDa polypeptide, chloroplast precursor                                   |
| Os03g0267000 | 2.45 | Low molecular mass heat shock protein Oshsp18.0; OsHSP18.0-CI                              |
| Os01g0232000 | 2.44 | Major intrinsic protein family protein; probable aquaporin TIP4.3 (OsTIP4;3)               |
| Os05g0116100 | 2.44 | Dehydroascorbate reductase 1; OsDHAR1                                                      |
| Os03g0843800 | 2.43 | Methyl chloride transferase; harmless to ozone layer 1 (OsHOL1)                            |
| Os04g0691900 | 2.42 | Chaperonin Cpn60/TCP-1 family protein                                                      |
| Os03g0180900 | 2.42 | Jasmonate ZIM-domain protein 2; OsJAZ2                                                     |
| Os03g0848700 | 2.38 | Brown planthopper resistance-14; Bph14                                                     |
| Os01g0111100 | 2.38 | Cyclophilin-like domain containing protein; OsCYP26-2                                      |
| Os01g0838350 | 2.37 | Phosphate-limitation inducible gene 1; OsPI1                                               |
| Os02g0629200 | 2.36 | Probable aquaporin PIP2-2; OsPIP2;2                                                        |
| Os01g0583300 | 2.31 | Zinc finger, C2H2, LYAR-type domain containing protein; Os_F0727                           |
| Os03g0161900 | 2.31 | Heat stress transcription factor A2d; HSfA2d                                               |
| Os04g0345400 | 2.30 | Terpene synthase 24; OsTPS24                                                               |
| Os03g0782500 | 2.30 | Phytochrome-interacting factor-like protein 1; OsPIL1                                      |
| Os10g0506100 | 2.25 | Heavy metal transport/detoxification protein domain containing protein                     |
| AK100788.1   | 2.24 | ABA/WDS induced protein                                                                    |
| Os01g0939500 | 2.23 | Similar to eukaryotic peptide chain release factor subunit 1-2 (eRF1-2)                    |
| Os02g0553200 | 2.23 | Ascorbate peroxidase 8; OsAPx8                                                             |
| Os04g0423400 | 2.20 | Abiotic stress responsive 2 (OsASR2); ABA-, stress and ripening-induced protein 4 (OsASR4) |
| Os01g0117900 | 2.20 | Similar to nodulin-like protein                                                            |
| Os11g0222225 | 2.18 | Serpin domain containing protein                                                           |
| Os02g0707000 | 2.17 | Monodehydroascorbate reductase 1; OsMDHAR1                                                 |
| Os01g0284700 | 2.17 | Similar to peptidyl-prolyl cis-trans isomerase; OsCYP20-3                                  |
| Os11g0592000 | 2.15 | Pathogenesis-related protein 4c; OsPR4c                                                    |
| Os08g0479300 | 2.13 | Cyclin, A/B/D/E domain containing protein                                                  |
| Os03g0285700 | 2.11 | L-ascorbate peroxidase 1; OsAPX1                                                           |
| Os03g0745000 | 2.10 | Heat stress transcription factor A2a; HSfA2                                                |
| Os01g0232000 | 2.09 | Probable aquaporin TIP4.3                                                                  |
| Os05g0515900 | 2.08 | Similar to heat- and acid-stable phosphoprotein                                            |
| Os05g0247100 | 2.08 | Drought-induced protein 3; DIP3                                                            |
| Os02g0753800 | 2.07 | Similar to annexin p35; OsANN2                                                             |
| Os12g0538700 | 2.07 | Glutaredoxin 29; OsGRX29                                                                   |
| Os06g0158900 | 2.04 | Similar to multidrug-resistance associated protein 3                                       |

|              |      |                                                         |
|--------------|------|---------------------------------------------------------|
| Os03g0163300 | 2.03 | Glutathione reductase 1                                 |
| Os01g0175600 | 2.02 | Boron (B) transporter; OsBOR2                           |
| Os08g0112700 | 2.02 | Similar to TAGL12 transcription factor                  |
| Os11g0143500 | 2.00 | Similar to L-galactono-1,4-lactone dehydrogenase; GalDH |

**Table S4.** ClueGO classification of the genes upregulated in transgenic (TR1) plants.

| GO ID      | GO Term                             | Ontology source | Associated genes                                                       |
|------------|-------------------------------------|-----------------|------------------------------------------------------------------------|
| GO:0000302 | Response to reactive oxygen species | BP              | LOC4329643, LOC4332360, LOC4332361, LOC4332474                         |
| GO:0004130 | Cytochrome-c peroxidase activity    | MF              | LOC4329643, LOC4332474                                                 |
| GO:0016688 | L-ascorbate peroxidase activity     | MF              | LOC4329643, LOC4332474                                                 |
| GO:0042542 | Response to hydrogen peroxide       | BP              | LOC4332360, LOC4332361                                                 |
| GO:0042744 | Hydrogen peroxide catabolic process | BP              | LOC4329643, LOC4332474                                                 |
| GO:0098869 | Cellular oxidant detoxification     | BP              | LOC4329643, LOC4332474                                                 |
| GO:0045471 | Response to ethanol                 | BP              | LOC4332360, LOC4332361                                                 |
| GO:0046686 | Response to cadmium ion             | BP              | LOC4332360, LOC4332361                                                 |
| GO:0046688 | Response to copper ion              | BP              | LOC4332360, LOC4332361                                                 |
| GO:0051188 | Cofactor biosynthetic process       | BP              | LOC4326739, LOC4326901, LOC4328930, LOC4337415                         |
| GO:0009108 | Coenzyme biosynthetic process       | BP              | LOC4326739, LOC4328930                                                 |
| GO:0031967 | Organelle envelope                  | CC              | LOC4326901, LOC4329643, LOC4333985, LOC4340941, LOC4343584, LOC4349749 |
| GO:0015994 | Chlorophyll metabolic process       | BP              | LOC4326901, LOC4337415, LOC4343584                                     |
| GO:0009528 | Plastid inner membrane              | CC              | LOC4326901, LOC4343584                                                 |
| GO:0009941 | Chloroplast envelope                | CC              | LOC4326901, LOC4329643, LOC4333985, LOC4340941, LOC4343584             |
| GO:0005525 | GTP binding                         | MF              | LOC4325879, LOC4337890, LOC4338790                                     |
| GO:0008299 | Isoprenoid biosynthetic process     | BP              | LOC4338768, LOC4343523                                                 |
| GO:0009966 | Regulation of signal transduction   | BP              | LOC4331833, LOC9267696                                                 |

|            |                                                             |    |                                                                                                      |
|------------|-------------------------------------------------------------|----|------------------------------------------------------------------------------------------------------|
| GO:0004553 | Hydrolase activity,<br>hydrolyzing O-<br>glycosyl compounds | MF | LOC4329920, LOC4343697, LOC4344146,<br>LOC4345995, LOC4349267                                        |
| GO:1901565 | Organonitrogen<br>compound catabolic<br>process             | BP | LOC4329920, LOC4343584, LOC4349267                                                                   |
| GO:0004568 | Chitinase activity                                          | MF | LOC4329920, LOC4349267                                                                               |
| GO:0016998 | Cell wall<br>macromolecule<br>catabolic process             | BP | LOC4329920, LOC4349267                                                                               |
| GO:0102483 | Scopolin beta-<br>glucosidase activity                      | MF | LOC4344146, LOC4345995                                                                               |
| GO:0008422 | Beta-glucosidase<br>activity                                | MF | LOC4344146, LOC4345995                                                                               |
| GO:0006032 | Chitin catabolic<br>process                                 | BP | LOC4329920, LOC4349267                                                                               |
| GO:0019725 | Cellular homeostasis                                        | BP | LOC4324276, LOC4325734, LOC4330049,<br>LOC4330468, LOC4340941, LOC4343119,<br>LOC4343348, LOC4352426 |
| GO:0045454 | Cell redox homeostasis                                      | BP | LOC4325734, LOC4330468, LOC4343348,<br>LOC4352426                                                    |
| GO:0006833 | Water transport                                             | BP | LOC4324276, LOC4330049, LOC4340941,<br>LOC4343119                                                    |
| GO:0015250 | Water channel activity                                      | MF | LOC4324276, LOC4330049, LOC4340941,<br>LOC4343119                                                    |
| GO:0009992 | Cellular water<br>homeostasis                               | BP | LOC4324276, LOC4330049, LOC4340941,<br>LOC4343119                                                    |
| GO:0015254 | Glycerol channel<br>activity                                | MF | LOC4324276, LOC4330049, LOC4340941,<br>LOC4343119                                                    |
| GO:0015793 | Glycerol transport                                          | BP | LOC4324276, LOC4330049, LOC4340941,<br>LOC4343119                                                    |
| GO:0009705 | Plant-type vacuole<br>membrane                              | CC | LOC4324276, LOC4340941                                                                               |
| GO:0042807 | Central vacuole                                             | CC | LOC4324276, LOC4340941                                                                               |
| GO:0044283 | Small molecule<br>biosynthetic process                      | BP | LOC4326739, LOC4338768, LOC4343348,<br>LOC4344361, LOC4349749                                        |
| GO:0042364 | Water-soluble vitamin<br>biosynthetic process               | BP | LOC4326739, LOC4338768, LOC4349749                                                                   |
| GO:0019725 | Cellular homeostasis                                        | BP | LOC4324276, LOC4325734, LOC4330049,<br>LOC4330468, LOC4340941, LOC4343119,<br>LOC4343348, LOC4352426 |
| GO:0045454 | Cell redox homeostasis                                      | BP | LOC4325734, LOC4330468, LOC4343348,<br>LOC4352426                                                    |



|            |                                                   |      |                                    |
|------------|---------------------------------------------------|------|------------------------------------|
| GO:0015035 | Protein disulfide<br>oxidoreductase activity      | MF   | LOC4325734, LOC4352426             |
| GO:0005385 | Zinc ion<br>transmembrane<br>transporter activity | MF   | LOC4326901, LOC9271816             |
| GO:0071577 | Zinc II ion<br>transmembrane<br>transport         | BP   | LOC4326901, LOC9271816             |
| GO:0071822 | Protein complex<br>subunit organization           | BP   | LOC4325697, LOC4334594, LOC4343584 |
| GO:0000603 | Glycosphingolipid<br>biosynthesis                 | KEGG | LOC4343697, LOC4344290, LOC4348988 |

---

BP, biological process; MF, molecular function; CC, cellular component.  
LOC number was identified by Quick GO (<https://www.ebi.ac.uk/QuickGO/>) which is a fast browser for Gene Ontology terms and annotations.

---

**Table S5.** Genes downregulated in paddy field-grown transgenic rice (TR1) plants.

| Gene symbol  | Intensity | Gene information                                                                                              |
|--------------|-----------|---------------------------------------------------------------------------------------------------------------|
| Os11g0188850 | 0.01      | RNA-directed DNA polymerase                                                                                   |
| AK062276.1   | 0.01      | F-box domain containing protein                                                                               |
| Os11g0182500 | 0.01      | Ankyrin repeat domain containing protein; OsPIANK1                                                            |
| Os06g0185400 | 0.05      | Conserved hypothetical protein                                                                                |
| CB656443     | 0.06      | Cysteine protease 1 precursor                                                                                 |
| Os02g0582600 | 0.10      | Heavy metal transport/detoxification protein domain containing protein                                        |
| Os02g0187800 | 0.17      | Cinnamyl alcohol dehydrogenase                                                                                |
| Os06g0579200 | 0.19      | Low-affinity cation transporter                                                                               |
| Os09g0417600 | 0.23      | WRKY transcription factor 76; OsWRKY76                                                                        |
| Os01g0816700 | 0.24      | Similar to L-ascorbate oxidase homolog precursor                                                              |
| Os08g0157500 | 0.25      | Quercetin 3-O-methyltransferase 1; COMT                                                                       |
| Os09g0532900 | 0.27      | Transcription factor MYB42/85; OsMYB42/85                                                                     |
| Os04g0675400 | 0.27      | DnaJ domain protein C45; OsDjC45                                                                              |
| Os05g0322900 | 0.28      | Similar to WRKY transcription factor 45; OsWRKY45                                                             |
| Os09g0456800 | 0.28      | Similar to heat stress transcription factor Spl7 (Heat shock transcription factor) (Heat shock factor RHSF10) |
| Os03g0179400 | 0.29      | Drought-inducible receptor-like cytoplasmic kinase, Drought tolerance, Regulator of grain yield               |
| Os04g0434800 | 0.29      | Similar to thylakoid-bound ascorbate peroxidase; OsAPx7                                                       |
| Os11g0199700 | 0.30      | Similar to VHS and GAT domain protein; similar to seed protein B32E                                           |
| Os06g0157700 | 0.30      | Florigen, heading date; flowering locus T                                                                     |
| Os06g0111600 | 0.30      | Serine/threonine protein kinase-related domain containing protein; OsWAK11                                    |
| Os10g0552400 | 0.30      | Zinc finger, RING/FYVE/PHD-type domain containing protein; OsPUB67                                            |

|                |      |                                                                                                                      |
|----------------|------|----------------------------------------------------------------------------------------------------------------------|
| Os11g0490900   | 0.32 | Similar to WRKY transcription factor 72; OsWRKY72                                                                    |
| Os04g0675400   | 0.32 | Similar to chaperone protein dnaJ; OsDjC45                                                                           |
| Os01g0134700   | 0.32 | Calmodulin binding protein-like family protein                                                                       |
| LOC_Os01g06900 | 0.32 | Verticillium wilt disease resistance protein Ve2                                                                     |
| Os03g0187400   | 0.33 | Zinc finger, FYVE/PHD-type domain containing protein                                                                 |
| Os06g0232300   | 0.35 | Similar to auxin transport protein REH1                                                                              |
| Os01g0289666   | 0.35 | WRKY9                                                                                                                |
| Os09g0532000   | 0.36 | TonB box, conserved site domain containing protein; stay green leaf (t), stay green, staying green during senescence |
| Os11g0597700   | 0.36 | Similar to resistant protein                                                                                         |
| Os07g0683200   | 0.37 | Similar to NAC domain transcription factor; ONAC103                                                                  |
| Os01g0141000   | 0.37 | APETALA2/ethylene-responsive element binding protein 129; AP2/EREBP#129                                              |
| Os06g0671600   | 0.37 | Small auxin-up RNA 26; OsSAUR26                                                                                      |
| Os01g0194600   | 0.37 | Glutaredoxin 2; OsGRX2                                                                                               |
| Os01g0971800   | 0.37 | Similar to two-component response regulator ARR11                                                                    |
| Os01g0178900   | 0.37 | Similar to symbiosis-related disease resistance protein                                                              |
| Os03g0626700   | 0.38 | Multi antimicrobial extrusion protein MatE family protein                                                            |
| Os07g0680400   | 0.39 | DNA-binding WRKY domain containing protein; OsWRKY47                                                                 |
| Os06g0143100   | 0.39 | Similar to cadmium tolerant 1                                                                                        |
| Os09g0313600   | 0.40 | Disease resistance protein domain containing protein                                                                 |
| Os02g0303500   | 0.40 | Eggshell protein family protein                                                                                      |
| Os11g0184900   | 0.41 | Similar to OsNAC5 protein                                                                                            |
| Os11g0126900   | 0.41 | NAC-domain protein, drought tolerance                                                                                |
| Os06g0157500   | 0.41 | Florigen, flowering time, long-day promotion                                                                         |
| Os05g0120700   | 0.42 | ATPase, P-type, K/Mg/Cd/Cu/Zn/Na/Ca/Na/H-transporter family protein                                                  |
| Os07g0665200   | 0.43 | Cu/Zn-superoxide dismutase; Cu/Zn-SOD                                                                                |
| Os01g0665500   | 0.43 | Similar to WRKY transcription factor 16; OsWRKY16                                                                    |
| Os05g0439000   | 0.43 | Similar to RING-H2 finger protein ATL10                                                                              |
| Os05g0198200   | 0.43 | Glutaredoxin 16; OsGRX16                                                                                             |
| Os02g0738200   | 0.43 | Zinc finger, RING/FYVE/PHD-type domain containing protein                                                            |
| LOC_Os03g25150 | 0.43 | Flavonoid 3,5-hydroxylase 2                                                                                          |
| Os03g0341600   | 0.44 | Pollen Ole e 1 allergen/extensin domain containing protein                                                           |
| Os06g0125800   | 0.44 | Zinc finger, RING/FYVE/PHD-type domain containing protein                                                            |
| Os04g0418500   | 0.44 | Similar to photoperiod responsive protein                                                                            |
| Os03g0182800   | 0.44 | Similar to ethylene responsive element binding factor3 (OsERF3); EREBP transcription factor                          |
| Os01g0135900   | 0.44 | Similar to cytosolic class I small heat shock protein 3C; OsHsp17.9B                                                 |
| Os03g0787000   | 0.44 | Similar to syntaxin                                                                                                  |
| Os06g0218300   | 0.44 | Zinc finger, RING-type domain containing protein                                                                     |
| Os05g0549800   | 0.44 | Similar to DNA-binding protein RAV1; APETALA2/ethylene-responsive element binding protein 96 (AP2/EREBP#096)         |

|                |      |                                                                                                                    |
|----------------|------|--------------------------------------------------------------------------------------------------------------------|
| Os02g0571100   | 0.44 | Terpenoid synthase domain containing protein                                                                       |
| Os05g0530400   | 0.45 | Heat stress transcription factor Spl7 (Heat shock transcription factor) (Heat shock factor RHSF10); HSF10          |
| Os07g0107300   | 0.45 | Plant disease resistance response protein family protein                                                           |
| Os06g0614100   | 0.45 | bZIP transcription factor, bZIP-1 domain containing protein; OsbZIP49                                              |
| Os01g0974400   | 0.45 | Zinc finger, RING/FYVE/PHD-type domain containing protein; OsRFPHC-7                                               |
| LOC_Os09g04430 | 0.45 | Lactoylglutathione lyase                                                                                           |
| Os01g0563000   | 0.45 | Peptidyl-prolyl cis-trans isomerase, FKBP-type domain containing protein; OsFKBP73                                 |
| Os01g0949700   | 0.45 | Glutathione S-transferase, C-terminal domain containing protein; OsGSTU7                                           |
| Os01g0723100   | 0.45 | Senescence-associated family protein                                                                               |
| Os01g0933900   | 0.45 | Similar to glutathione transferase III(B); OsGSTF4                                                                 |
| Os01g0542700   | 0.45 | bZIP transcription factor, bZIP-1 domain containing protein; OsbZIP04                                              |
| Os12g0105600   | 0.45 | Similar to phosphate starvation regulator protein (regulatory protein of P- starvation acclimation response Psr1). |
| Os03g0411100   | 0.45 | Similar to Nuclear Y/CCAAT-box binding factor A subunit NF-YA; OsHAP2E, NF-YA, CBF-B                               |
| Os05g0553400   | 0.45 | Similar to Myb-related transcription factor-like protein (MYB transcription factor); OsMYB55, OsMYB-2              |
| Os08g0386200   | 0.46 | WRKY transcription factor 69; OsWRKY69                                                                             |
| Os01g0949700   | 0.46 | Glutathione S-transferase, C-terminal domain containing protein; OsGSTU7                                           |
| Os02g0578400   | 0.46 | Photosystem II oxygen evolving complex protein PsbQ family protein                                                 |
| Os03g0718800   | 0.46 | Similar to physical impedance induced protein                                                                      |
| Os06g0701600   | 0.46 | Monovalent cation transporter, Na <sup>+</sup> and K <sup>+</sup> transport; OsHKT9, OsHKT2;4                      |
| Os09g0524800   | 0.46 | Apoptosis regulator Bcl-2 protein, BAG domain containing protein; OsBAG1                                           |
| Os03g0835900   | 0.46 | Similar to ferredoxin III, chloroplast precursor (Fd III)                                                          |
| Os03g0259100   | 0.46 | Similar to basic blue protein (cusacyanin) (plantacyanin) (CBP)                                                    |
| Os09g0467200   | 0.47 | Similar to glutathione S-transferase GST 23                                                                        |
| Os05g0557700   | 0.47 | Conserved hypothetical protein; leaf tip necrosis1, phosphate overaccumulator 2                                    |
| Os10g0159800   | 0.48 | Alcohol dehydrogenase superfamily, zinc-containing protein                                                         |
| Os02g0105400   | 0.48 | Similar to L-lactate dehydrogenase A                                                                               |
| Os07g0608200   | 0.49 | Similar to CCAAT-binding transcription factor subunit B; CBF-B                                                     |
| Os05g0537100   | 0.49 | WRKY transcription factor 10                                                                                       |
| Os01g0246700   | 0.49 | Similar to WRKY transcription factor 1; OsWRKY1                                                                    |
| Os06g0292400   | 0.49 | Embryogenesis transmembrane protein                                                                                |
| Os01g0225000   | 0.49 | Mitochondrial carrier protein domain containing protein                                                            |

---

Intensity is represented as a Log<sub>2</sub> ratio.

---

**Table S6.** ClueGO classification of genes downregulated in transgenic (TR1) plants.

| GO ID      | GO Term                                                   | Ontology source | Associated genes                                                                                                                   |
|------------|-----------------------------------------------------------|-----------------|------------------------------------------------------------------------------------------------------------------------------------|
| GO:0006082 | Organic acid metabolic process                            | BP              | LOC4328012, LOC4330034, LOC4330040, LOC4330649, LOC4333014, LOC4333918, LOC4334487, LOC4337165, LOC4341343, LOC4343946             |
| GO:0016053 | Organic acid biosynthetic process                         | BP              | LOC4330034, LOC4330040, LOC4330649, LOC4333014, LOC4333918, LOC4337165, LOC4341343, LOC4343946                                     |
| GO:0006520 | Cellular amino acid metabolic process                     | BP              | LOC4330034, LOC4330040, LOC4330649, LOC4333014, LOC4333918, LOC4337165, LOC4343946                                                 |
| GO:0009073 | Aromatic amino acid family biosynthetic process           | BP              | LOC4333014, LOC4333918, LOC4337165, LOC4343946                                                                                     |
| GO:0019752 | Carboxylic acid metabolic process                         | BP              | LOC4328012, LOC4330034, LOC4330040, LOC4330649, LOC4333014, LOC4333918, LOC4334487, LOC4337165, LOC4343946                         |
| GO:1901607 | Alpha-amino acid biosynthetic process                     | BP              | LOC4330649, LOC4333918                                                                                                             |
| GO:0006541 | Glutamine metabolic process                               | BP              | LOC4330649, LOC4333918                                                                                                             |
| GO:0008652 | Cellular amino acid biosynthetic process                  | BP              | LOC4330649, LOC4333014, LOC4333918, LOC4337165, LOC4343946                                                                         |
| GO:0043648 | Dicarboxylic acid metabolic process                       | BP              | LOC4333014, LOC4334487, LOC4337165, LOC4343946                                                                                     |
| GO:0009423 | Chorismate biosynthetic process                           | BP              | LOC4333014, LOC4337165, LOC4343946                                                                                                 |
| GO:0008171 | O-methyltransferase activity                              | MF              | LOC4344702, LOC4345934, LOC4345935                                                                                                 |
| GO:0008757 | S-adenosylmethionine-dependent methyltransferase activity | MF              | LOC4344702, LOC4345934, LOC4345935                                                                                                 |
| GO:0006556 | S-adenosylmethionine biosynthetic process                 | BP              | LOC4325163, LOC4337733                                                                                                             |
| GO:0006811 | Ion transport                                             | BP              | LOC4324220, LOC4329628, LOC4331635, LOC4333298, LOC4334717, LOC4335115, LOC4335729, LOC4336365, LOC4336726, LOC4341805, LOC4346978 |

|            |                                              |      |                                                                                                                                                                                    |
|------------|----------------------------------------------|------|------------------------------------------------------------------------------------------------------------------------------------------------------------------------------------|
| GO:0015075 | Ion transmembrane transporter activity       | MF   | LOC4324220, LOC4329628, LOC4333298, LOC4334717, LOC4335729, LOC4336365, LOC4341805, LOC4346978                                                                                     |
| GO:0055085 | Transmembrane transport                      | BP   | LOC4324220, LOC4326735, LOC4329628, LOC4331635, LOC4333298, LOC4334717, LOC4335115, LOC4335729, LOC4336365, LOC4336442, LOC4338107, LOC4340580, LOC4341805, LOC4346978, LOC4349520 |
| GO:0071705 | Nitrogen compound transport                  | BP   | LOC4324220, LOC4329628, LOC4334717, LOC4336365, LOC4349520                                                                                                                         |
| GO:0031226 | Intrinsic component of plasma membrane       | CC   | LOC4324220, LOC4324284, LOC4329628, LOC4334717, LOC4335115, LOC4336365, LOC4338107, LOC4349520                                                                                     |
| GO:0006812 | Cation transport                             | BP   | LOC4329628, LOC4333298, LOC4334717, LOC4335729, LOC4336365, LOC4336726, LOC4341805, LOC4346978                                                                                     |
| GO:0034220 | Ion transmembrane transport                  | BP   | LOC4324220, LOC4329628, LOC4333298, LOC4334717, LOC4335729, LOC4336365, LOC4341805, LOC4346978                                                                                     |
| GO:0015695 | Organic cation transport                     | BP   | LOC4329628, LOC4334717, LOC4336365                                                                                                                                                 |
| GO:0008519 | Ammonium transmembrane transporter activity  | MF   | LOC4329628, LOC4334717, LOC4336365                                                                                                                                                 |
| GO:0030001 | Metal ion transport                          | BP   | LOC4333298, LOC4335729, LOC4336726, LOC4341805, LOC4346978                                                                                                                         |
| GO:0071805 | Potassium ion transmembrane transport        | BP   | LOC4333298, LOC4335729, LOC4341805                                                                                                                                                 |
| GO:0072488 | Ammonium transmembrane transport             | BP   | LOC4329628, LOC4334717, LOC4336365                                                                                                                                                 |
| GO:0046873 | Metal ion transmembrane transporter activity | MF   | LOC4333298, LOC4335729, LOC4341805, LOC4346978                                                                                                                                     |
| GO:0098869 | Cellular oxidant detoxification              | BP   | LOC4335896, LOC4336726, LOC4345742, LOC4347158                                                                                                                                     |
| GO:0009570 | Chloroplast stroma                           | CC   | LOC4335896, LOC4336726, LOC4347672                                                                                                                                                 |
| GO:0004016 | MAPK signaling pathway                       | KEGG | LOC4324163, LOC4334072, LOC4339397, LOC4339461, LOC4345742, LOC4346736, LOC4347158                                                                                                 |
| GO:0009698 | Phenylpropanoid metabolic process            | BP   | LOC4328485, LOC4328552, LOC4330034, LOC4330040, LOC4345717                                                                                                                         |

|            |                                                        |    |                                                |
|------------|--------------------------------------------------------|----|------------------------------------------------|
| GO:0044550 | Secondary metabolite biosynthetic process              | BP | LOC4328552, LOC4330034, LOC4330040, LOC4341343 |
| GO:0016207 | 4-coumarate-CoA ligase activity                        | MF | LOC4328485, LOC4345717                         |
| GO:0045548 | Phenylalanine ammonia-lyase activity                   | MF | LOC4330034, LOC4330040                         |
| GO:0006559 | L-phenylalanine catabolic process                      | BP | LOC4330034, LOC4330040                         |
| GO:0015035 | Protein disulfide oxidoreductase activity              | MF | LOC4327316, LOC4338050                         |
| GO:0015291 | Secondary active transmembrane transporter activity    | MF | LOC4324220, LOC4331635, LOC4335115, LOC4349520 |
| GO:0005315 | Inorganic phosphate transmembrane transporter activity | MF | LOC4331635, LOC4335115                         |
| GO:0006820 | Anion transport                                        | BP | LOC4324220, LOC4331635, LOC4335115             |
| GO:0006817 | Phosphate ion transport                                | BP | LOC4331635, LOC4335115                         |
| GO:0016567 | Protein ubiquitination                                 | BP | LOC4324295, LOC4330663, LOC4339966, LOC4339988 |
| GO:0016602 | CCAAT-binding factor complex                           | CC | LOC4333094, LOC4343866                         |
| GO:0031969 | Chloroplast membrane                                   | CC | LOC4341343, LOC4347672                         |
| GO:0042435 | Indole-containing compound biosynthetic process        | BP | LOC4333918, LOC4344702                         |
| GO:0048573 | Photoperiodism, flowering                              | BP | LOC4340184, LOC4340185                         |
| GO:0009909 | Regulation of flower development                       | BP | LOC4340184, LOC4340185                         |

---

BP, biological process; MF, molecular function; CC, cellular component

LOC number was identified using Quick GO (<https://www.ebi.ac.uk/QuickGO/>), which is a fast browser for Gene Ontology terms and annotations.

---

**Table S7.** Functional classification of genes differentially expressed in transgenic rice (TR1) plants.

| Functional category | Gene count | Related gene                                                                                                                                                                                       |
|---------------------|------------|----------------------------------------------------------------------------------------------------------------------------------------------------------------------------------------------------|
| Apoptotic process   | 13         | Os01g0229400, Os11g0598500, Os03g0254000, Os03g0848700, Os03g0848700, Os10g0124300, Os12g0512400, Os09g0524800, Os11g0579200, Os11g0598300, Os02g0282000, Os11g0226933, Os11g0598500, Os09g0313600 |
| Cell cycle          | 2          | Os12g0143800, Os08g0479300                                                                                                                                                                         |

|                         |     |                                                                                                                                                                                                                                                                                                                                                                                                                                                                                                                        |
|-------------------------|-----|------------------------------------------------------------------------------------------------------------------------------------------------------------------------------------------------------------------------------------------------------------------------------------------------------------------------------------------------------------------------------------------------------------------------------------------------------------------------------------------------------------------------|
| Cell growth             | 6   | Os07g0679300, Os08g0509200, Os05g0548900, Os07g0148800, Os01g0142800, Os07g0690900                                                                                                                                                                                                                                                                                                                                                                                                                                     |
| Biological regulation   | 137 | Os01g0106400, Os07g0679300, Os07g0509800, Os01g0229400, Os11g0530600, Os03g0355900, Os01g0124000, Os11g0113700, Os07g0558500, Os03g0640800, Os02g0257300, Os05g0161500, Os11g0222225, Os05g0521300, Os07g0509800, Os04g0683700, Os05g0506000, Os03g0745000, Os03g0764600, Os09g0426800, Os12g0438600, Os05g0575000, Os06g0158900, Os01g0911300, Os05g0217800, etc.                                                                                                                                                     |
| Biosynthetic process    | 128 | Os08g0434100, Os10g0502400, Os03g0856500, Os03g0856500, Os06g0685300, Os07g0509800, Os09g0451400, Os04g0678700, Os11g0530600, Os12g0143800, Os03g0797400, Os03g0640800, Os07g0689600, Os07g0691200, Os07g0691200, Os11g0644800, Os02g0194700, Os02g0257300, Os11g0222225, Os05g0548900, Os01g0812800, Os03g0423300, Os03g0431200, Os11g0491400, Os01g0225400, Os03g0850400, Os09g0294000, etc.                                                                                                                         |
| Cell adhesion           | 8   | Os05g0453300, Os07g0148800, Os03g0764600, Os11g0667700, Os01g0911300, Os11g0199700, Os07g0511400, Os09g0364400                                                                                                                                                                                                                                                                                                                                                                                                         |
| Cell differentiation    | 10  | Os07g0679300, Os07g0124100, Os06g0157700, Os06g0157500, Os08g0509200, Os05g0548900, Os07g0148800, Os09g0426800, Os01g0142800, Os02g0122600                                                                                                                                                                                                                                                                                                                                                                             |
| Cell development        | 6   | Os07g0679300, Os08g0509200, Os05g0548900, Os07g0148800, Os01g0142800, Os02g0122600                                                                                                                                                                                                                                                                                                                                                                                                                                     |
| Lipid metabolic process | 39  | Os06g0685300, Os07g0679300, Os11g0530600, Os03g0355900, Os07g0558500, Os01g0717000, Os03g0700700, Os09g0513100, Os02g0194700, Os02g0257300, Os05g0548900, Os03g0423300, Os02g0589000, Os02g0596000, Os01g0757200, Os07g0546000, Os09g0426800, Os01g0369900, Os02g0571100, Os07g0616200, Os03g0261100, Os05g0363200, Os10g0140300, Os10g0533500, Os07g0598000, Os03g0356582, Os06g0694200, Os06g0569500, Os07g0190000, Os06g0600400, Os05g0408900, Os10g0493600, Os08g0441500, Os07g0412100, Os07g0162100, Os06g0685300 |
| Transport               | 102 | Os08g0434100, Os06g0685300, Os07g0679300, Os01g0229400, Os05g0160300, Os11g0530600, Os07g0558500, Os07g0689600, Os02g0257300, Os03g0638200, Os03g0638200, Os06g0264500, Os02g0596000, Os01g0232000, Os04g0683700, Os06g0566300, Os12g0438600, Os01g0825800, Os04g0612400, Os04g0612400, Os04g0612500, Os04g0612500, Os09g0537700, etc.                                                                                                                                                                                 |
| Translation             | 10  | Os03g0856500, Os03g0856500, Os01g0812800, Os01g0185200, Os09g0265800, Os09g0294000, Os01g0939500, Os02g0529700, Os03g0816200, Os04g0573200                                                                                                                                                                                                                                                                                                                                                                             |

---
